# Supplementary material for: Impact of DNA Extraction Method on Variation in Human and Built Environment Microbial Community and Functional Profiles Assessed by Shotgun Metagenomics Sequencing
Source: Front Microbiol. 2020 May 25;11:953. doi: 10.3389/fmicb.2020.00953 (PMC7262970; doi:10.3389/fmicb.2020.00953)
Supplement: Supplementary file 2 [file Table_2.csv]

Table S2
pathway	value	coef	stderr	p-value	FDR
mevalonate pathway I	Qiagen vs. Phenol	0.687	0.145	2.03E-05	2.66E-04
superpathway of purine nucleotide salvage	Qiagen vs. Phenol	0.464	0.109	9.17E-05	9.46E-04
superpathway of purine deoxyribonucleosides degradation	Qiagen vs. Phenol	0.47	0.116	1.94E-04	0.001715781
gamma;-glutamyl cycle	Qiagen vs. Phenol	-1.49	0.377	2.48E-04	0.002114556
lactose and galactose degradation I	Qiagen vs. Phenol	0.519	0.133	3.03E-04	0.002514494
NAD/NADP-NADH/NADPH mitochondrial interconversion (yeast)	Zymo vs. Phenol	-1.31	0.346	4.20E-04	0.003358024
glycolysis VI (metazoan)	Zymo vs. Phenol	0.385	0.102	4.40E-04	0.00350354
phospholipid remodeling (phosphatidylethanolamine, yeast)	Zymo vs. Phenol	0.353	0.095	5.45E-04	0.0043023
superpathway of purine nucleotide salvage	Zymo vs. Phenol	0.416	0.113	5.58E-04	0.004387953
(5Z)-dodec-5-enoate biosynthesis	Qiagen vs. Phenol	-0.253	0.069	6.12E-04	0.004755943
superpathway of lipopolysaccharide biosynthesis	Zymo vs. Phenol	0.378	0.104	7.10E-04	0.005425083
oxygenic photosynthesis	Qiagen vs. Phenol	0.398	0.112	8.33E-04	0.006159321
ureide biosynthesis	Qiagen vs. Phenol	0.572	0.162	9.53E-04	0.00673794
chitin degradation to ethanol	Zymo vs. Phenol	-0.663	0.189	9.63E-04	0.00678235
oleate biosynthesis IV (anaerobic)	Qiagen vs. Phenol	-0.235	0.067	9.75E-04	0.006845769
palmitoleate biosynthesis I (from (5Z)-dodec-5-enoate)	Qiagen vs. Phenol	-0.239	0.068	9.85E-04	0.006887162
photosynthetic 3-hydroxybutanoate biosynthesis (engineered)	Qiagen vs. Phenol	0.324	0.093	0.001103024	0.00748334
oxygenic photosynthesis	Promega vs. Phenol	0.38	0.112	0.001355415	0.008679414
glycolysis I (from glucose 6-phosphate)	Zymo vs. Phenol	0.311	0.092	0.001481257	0.009386435
ADP-L-glycero-beta;-D-manno-heptose biosynthesis	Qiagen vs. Phenol	-0.439	0.132	0.001620968	0.010065069
NAD/NADP-NADH/NADPH mitochondrial interconversion (yeast)	Qiagen vs. Phenol	-1.114	0.334	0.001621441	0.010065069
fatty acid elongation -- saturated	Qiagen vs. Phenol	-0.221	0.067	0.001767924	0.010863504
seleno-amino acid biosynthesis	Qiagen vs. Phenol	0.293	0.089	0.001871668	0.011346216
superpathway of UDP-glucose-derived O-antigen building blocks biosynthesis	Promega vs. Phenol	0.343	0.105	0.001996011	0.011982633
superpathway of purine deoxyribonucleosides degradation	Zymo vs. Phenol	0.394	0.121	0.002038051	0.012155045
L-lysine biosynthesis II	Qiagen vs. Phenol	0.337	0.104	0.002085694	0.012398672
L-ornithine biosynthesis	Qiagen vs. Phenol	-0.297	0.092	0.002106729	0.012483055
trehalose degradation V	Promega vs. Phenol	0.257	0.079	0.002190279	0.012770796
superpathway of arginine and polyamine biosynthesis	Qiagen vs. Phenol	-0.678	0.211	0.002300196	0.01320081
superpathway of polyamine biosynthesis I	Qiagen vs. Phenol	-0.744	0.231	0.002320767	0.013277112
glycolysis II (from fructose 6-phosphate)	Zymo vs. Phenol	0.278	0.088	0.002683169	0.015160317
photosynthetic 3-hydroxybutanoate biosynthesis (engineered)	Promega vs. Phenol	0.295	0.093	0.002720955	0.015326367
4-deoxy-L-threo-hex-4-enopyranuronate degradation	Qiagen vs. Phenol	-0.55	0.177	0.003123839	0.017381119
octanoyl-[acyl-carrier protein] biosynthesis (mitochondria, yeast)	Qiagen vs. Phenol	-0.246	0.079	0.003281381	0.018147033
all-trans-farnesol biosynthesis	Zymo vs. Phenol	0.604	0.197	0.003482557	0.019028939
D-fructuronate degradation	Qiagen vs. Phenol	-0.458	0.15	0.003731574	0.020208079
superpathway of glycolysis and Entner-Doudoroff	Zymo vs. Phenol	0.292	0.096	0.003711576	0.020208079
superpathway of purine nucleotide salvage	Promega vs. Phenol	0.33	0.109	0.003835766	0.020589038
lipid IVA biosynthesis	Qiagen vs. Phenol	-0.359	0.119	0.00393702	0.02107056
phytate degradation I	Zymo vs. Phenol	0.969	0.32	0.003953351	0.021096099
superpathway of thiamin diphosphate biosynthesis I	Qiagen vs. Phenol	-0.563	0.188	0.004238716	0.022165207
NAD/NADP-NADH/NADPH mitochondrial interconversion (yeast)	Promega vs. Phenol	-0.995	0.334	0.004488357	0.023189528
phenylacetate degradation I (aerobic)	Zymo vs. Phenol	0.237	0.08	0.00461052	0.023595765
glycolysis VI (metazoan)	Qiagen vs. Phenol	0.291	0.098	0.004762111	0.024276125
polyisoprenoid biosynthesis (E	Zymo vs. Phenol	0.552	0.188	0.005144053	0.025933414
superpathway of geranylgeranyldiphosphate biosynthesis I (via mevalonate)	Promega vs. Phenol	1.296	0.443	0.005191882	0.026102437
pyridoxal 5'-phosphate biosynthesis I	Qiagen vs. Phenol	-0.5	0.173	0.005785374	0.028613299
superpathway of methylglyoxal degradation	Zymo vs. Phenol	0.681	0.237	0.005923333	0.029216438
5-aminoimidazole ribonucleotide biosynthesis I	Qiagen vs. Phenol	0.241	0.084	0.006059155	0.029725692
galactose degradation I (Leloir pathway)	Qiagen vs. Phenol	0.26	0.09	0.006048891	0.029725692
trehalose degradation V	Zymo vs. Phenol	0.236	0.083	0.006345829	0.031048627
phospholipid remodeling (phosphatidylethanolamine, yeast)	Promega vs. Phenol	0.26	0.091	0.006546007	0.031775897
formaldehyde assimilation III (dihydroxyacetone cycle)	Qiagen vs. Phenol	0.418	0.147	0.006624869	0.031985148
S-adenosyl-L-methionine cycle I	Qiagen vs. Phenol	0.282	0.1	0.006826498	0.032871659
8-amino-7-oxononanoate biosynthesis I	Qiagen vs. Phenol	-0.516	0.183	0.006853335	0.032914041
pyrimidine deoxyribonucleotide phosphorylation	Qiagen vs. Phenol	0.195	0.07	0.007383875	0.035092636
L-methionine biosynthesis III	Qiagen vs. Phenol	0.253	0.091	0.00767441	0.036097418
thiazole biosynthesis I (E	Qiagen vs. Phenol	-0.609	0.22	0.008034278	0.037692952
L-isoleucine biosynthesis III	Qiagen vs. Phenol	0.192	0.07	0.008112843	0.037760009
peptidoglycan maturation (meso-diaminopimelate containing)	Zymo vs. Phenol	0.304	0.11	0.008070051	0.037760009
D-galactose degradation V (Leloir pathway)	Qiagen vs. Phenol	0.251	0.091	0.008426188	0.038734997
gondoate biosynthesis (anaerobic)	Qiagen vs. Phenol	-0.196	0.072	0.008637536	0.039212695
superpathway of branched amino acid biosynthesis	Qiagen vs. Phenol	0.192	0.07	0.008617726	0.039212695
nicotinate degradation I	Zymo vs. Phenol	-0.408	0.149	0.008719535	0.039248574
peptidoglycan biosynthesis V (beta;-lactam resistance)	Qiagen vs. Phenol	0.851	0.311	0.008712369	0.039248574
superpathway of GDP-mannose-derived O-antigen building blocks biosynthesis	Zymo vs. Phenol	-0.906	0.332	0.008692366	0.039248574
superpathway of phylloquinol biosynthesis	Zymo vs. Phenol	0.903	0.331	0.008731463	0.039248574
biotin biosynthesis I	Qiagen vs. Phenol	-0.465	0.172	0.009458403	0.042204364
L-homoserine and L-methionine biosynthesis	Qiagen vs. Phenol	0.232	0.087	0.010344325	0.045490104
adenine and adenosine salvage III	Qiagen vs. Phenol	0.316	0.119	0.010964622	0.047643894
glycolysis I (from glucose 6-phosphate)	Qiagen vs. Phenol	0.235	0.089	0.011141136	0.048181451
methylphosphonate degradation I	Zymo vs. Phenol	0.251	0.095	0.011324336	0.048857952
5-aminoimidazole ribonucleotide biosynthesis II	Qiagen vs. Phenol	0.213	0.082	0.011949329	0.050952162
superpathway of 5-aminoimidazole ribonucleotide biosynthesis	Qiagen vs. Phenol	0.213	0.082	0.011949329	0.050952162
CMP-3-deoxy-D-manno-octulosonate biosynthesis I	Qiagen vs. Phenol	-0.351	0.135	0.012343552	0.052388332
D-galacturonate degradation I	Qiagen vs. Phenol	-0.523	0.203	0.012896604	0.054106442
superpathway of S-adenosyl-L-methionine biosynthesis	Qiagen vs. Phenol	0.218	0.085	0.012935666	0.054145849
superpathway of phylloquinol biosynthesis	Promega vs. Phenol	0.821	0.319	0.013200677	0.054877529
leucopelargonidin and leucocyanidin biosynthesis	Promega vs. Phenol	1.347	0.531	0.013667915	0.056306874
pyrimidine deoxyribonucleotides de novo biosynthesis III	Zymo vs. Phenol	-0.466	0.183	0.013938048	0.0572904
pyruvate fermentation to isobutanol (engineered)	Qiagen vs. Phenol	0.209	0.083	0.014778346	0.059669208
1,4-dihydroxy-2-naphthoate biosynthesis I	Qiagen vs. Phenol	-0.387	0.154	0.015129041	0.060360412
1,4-dihydroxy-2-naphthoate biosynthesis II (plants)	Qiagen vs. Phenol	-0.387	0.154	0.015129041	0.060360412
L-isoleucine biosynthesis I (from threonine)	Qiagen vs. Phenol	0.194	0.077	0.015147983	0.060360412
L-methionine biosynthesis I	Qiagen vs. Phenol	0.24	0.095	0.015017137	0.060360412
superpathway of L-alanine biosynthesis	Zymo vs. Phenol	0.241	0.096	0.015014832	0.060360412
superpathway of fatty acid biosynthesis initiation (E	Qiagen vs. Phenol	-0.21	0.084	0.015889706	0.062903935
oxygenic photosynthesis	Zymo vs. Phenol	0.289	0.116	0.016021585	0.063288729
superpathway of purine deoxyribonucleosides degradation	Promega vs. Phenol	0.29	0.116	0.016082089	0.063390523
L-proline biosynthesis II (from arginine)	Qiagen vs. Phenol	0.407	0.163	0.016186834	0.06366589
superpathway of geranylgeranyldiphosphate biosynthesis I (via mevalonate)	Qiagen vs. Phenol	1.095	0.443	0.01688522	0.065582205
superpathway of beta;-D-glucuronide and D-glucuronate degradation	Qiagen vs. Phenol	-0.378	0.153	0.017421855	0.06730527
mycothiol biosynthesis	Qiagen vs. Phenol	0.69	0.283	0.018470951	0.070374707
heme biosynthesis I (aerobic)	Qiagen vs. Phenol	-0.397	0.164	0.019463479	0.07354213
superpathway of menaquinol-11 biosynthesis	Qiagen vs. Phenol	-0.28	0.117	0.020562388	0.076741019
superpathway of menaquinol-12 biosynthesis	Qiagen vs. Phenol	-0.28	0.117	0.020562388	0.076741019
superpathway of menaquinol-13 biosynthesis	Qiagen vs. Phenol	-0.28	0.117	0.020562388	0.076741019
adenosine ribonucleotides de novo biosynthesis	Qiagen vs. Phenol	0.212	0.089	0.020789421	0.077429988
adenosine deoxyribonucleotides de novo biosynthesis II	Qiagen vs. Phenol	0.219	0.092	0.021723102	0.079767932
guanosine deoxyribonucleotides de novo biosynthesis II	Qiagen vs. Phenol	0.219	0.092	0.021723102	0.079767932
L-arginine biosynthesis III (via N-acetyl-L-citrulline)	Qiagen vs. Phenol	-0.309	0.13	0.021669496	0.079767932
superpathway of sulfur amino acid biosynthesis (Saccharomyces cerevisiae)	Zymo vs. Phenol	-1.016	0.429	0.021604619	0.079767932
glycolysis VI (metazoan)	Promega vs. Phenol	0.233	0.098	0.021770197	0.079780342
glycolysis III (from glucose)	Qiagen vs. Phenol	0.18	0.076	0.022292769	0.081529287
glycolysis II (from fructose 6-phosphate)	Qiagen vs. Phenol	0.2	0.085	0.022502576	0.081848009
superpathway of pyrimidine nucleobases salvage	Qiagen vs. Phenol	0.202	0.086	0.022513808	0.081848009
photosynthetic 3-hydroxybutanoate biosynthesis (engineered)	Zymo vs. Phenol	0.228	0.097	0.022760012	0.082578572
coenzyme A biosynthesis II (mammalian)	Qiagen vs. Phenol	0.202	0.086	0.022935121	0.083048801
superpathway of heme biosynthesis from uroporphyrinogen-III	Zymo vs. Phenol	0.355	0.151	0.023045667	0.083283846
all-trans-farnesol biosynthesis	Promega vs. Phenol	0.442	0.189	0.02370286	0.085320947
Bifidobacterium shunt	Qiagen vs. Phenol	0.855	0.367	0.024004232	0.086235676
superpathway of adenosine nucleotides de novo biosynthesis I	Qiagen vs. Phenol	0.176	0.076	0.024367058	0.087195844
superpathway of adenosine nucleotides de novo biosynthesis II	Qiagen vs. Phenol	0.181	0.078	0.024464987	0.087374952
incomplete reductive TCA cycle	Zymo vs. Phenol	-0.397	0.171	0.024548926	0.087457519
superpathway of pyrimidine ribonucleosides degradation	Zymo vs. Phenol	-0.798	0.344	0.024583949	0.087457519
pyrimidine deoxyribonucleotides de novo biosynthesis III	Promega vs. Phenol	-0.408	0.176	0.024709237	0.087732214
colanic acid building blocks biosynthesis	Zymo vs. Phenol	-0.605	0.262	0.025045068	0.088751064
photosynthesis light reactions	Promega vs. Phenol	0.413	0.179	0.025142082	0.088751064
phosphatidylcholine acyl editing	Qiagen vs. Phenol	-0.521	0.226	0.025630936	0.089954726
L-glutamate and L-glutamine biosynthesis	Zymo vs. Phenol	-0.546	0.239	0.026300317	0.091950341
superpathway of geranylgeranyl diphosphate biosynthesis II (via MEP)	Zymo vs. Phenol	0.423	0.185	0.026404509	0.092138105
L-valine biosynthesis	Qiagen vs. Phenol	0.186	0.081	0.026611389	0.092506257
superpathway of L-methionine biosynthesis (transsulfuration)	Qiagen vs. Phenol	0.189	0.083	0.02671402	0.092686477
superpathway of pyrimidine ribonucleosides degradation	Promega vs. Phenol	-0.753	0.331	0.027364534	0.094576883
mevalonate pathway I	Promega vs. Phenol	0.33	0.145	0.027767479	0.09525498
glycogen degradation II (eukaryotic)	Zymo vs. Phenol	-0.689	0.304	0.027851147	0.095362747
2-methylcitrate cycle II	Qiagen vs. Phenol	-0.588	0.259	0.027908606	0.095380535
starch degradation V	Qiagen vs. Phenol	0.227	0.1	0.028134683	0.095973452
putrescine biosynthesis IV	Qiagen vs. Phenol	-0.565	0.25	0.028200452	0.096018329
formaldehyde assimilation II (RuMP Cycle)	Qiagen vs. Phenol	0.349	0.154	0.028311161	0.096036931
superpathway of hexuronide and hexuronate degradation	Qiagen vs. Phenol	-0.458	0.203	0.028620491	0.096906115
sucrose degradation IV (sucrose phosphorylase)	Promega vs. Phenol	0.914	0.405	0.028809028	0.097004567
L-arginine degradation II (AST pathway)	Qiagen vs. Phenol	-0.494	0.22	0.029015352	0.097519369
